# Supplementary material
Source: publisher figshare collection journal article supplement (https://acs.figshare.com/ndownloader/files/4396591)
Supplement: Supplementary file 1 [file 4396591]

# **Revelation of Multiple Underlying RuO<sub>2</sub> Redox Processes Associated with Pseudocapacitance and Electrocatalysis**

Chong-Yong Lee and Alan M. Bond\*

*School of Chemistry, Monash University, Clayton, Victoria 3800, Australia*

\*Corresponding author. E-mail: [alan.bond@sci.monash.edu.au](mailto:alan.bond@sci.monash.edu.au). Tel: +61 3 9905 1338.

Fax: +61 3 9905 4597.

## **Supporting Information**

**Table S1** Experimental values of  $I_{4\omega}^p$ ,  $I_{5\omega}^p$  and  $I_{6\omega}^p$  and their corresponding peak potentials for the redox centres A', Ru(III/II); B', Ru(IV/III); C', Ru(IV/V) and D', Ru(V/VI) as a function of H<sub>2</sub>SO<sub>4</sub> concentration (0.5 M to 3.0 M) derived from anhydrous RuO<sub>2</sub> and hydrated RuO<sub>2</sub>.nH<sub>2</sub>O (500 °C) thin film modified glassy carbon electrodes. The values of the ratio provided in Table 1  $I_{4\omega}^p/I_{6\omega}^p \cdot I_{5\omega}^p/I_{6\omega}^p$  are calculated from data in this table, where  $I_{4\omega}^p$ ,  $I_{5\omega}^p$  and  $I_{6\omega}^p$  represent the peak current magnitudes of the fourth, fifth and sixth ac harmonics, respectively.

| Sample                                         | H <sub>2</sub> SO <sub>4</sub><br>Conc.<br>(M) |                                   | Redox centre<br>A' [Ru(III/II)] | Redox centre<br>B' Ru(IV/III)] | Redox centre<br>C' [Ru(IV/V)] | Redox centre<br>D' [Ru(V/VI)] |
|------------------------------------------------|------------------------------------------------|-----------------------------------|---------------------------------|--------------------------------|-------------------------------|-------------------------------|
| RuO <sub>2</sub>                               | 0.50                                           | $I_{n\omega}^p$ (μA) <sup>a</sup> | 3.48,0.80,0.18                  | 4.60,2.5,1.27                  | 5.15,1.60,0.59                | 6.40,2.43,1.38                |
|                                                |                                                | $E_{n\omega}^p$ (V) <sup>b</sup>  | 0.32,0.32,0.32                  | 0.52,0.52,0.52                 | 1.00,1.00,1.00                | 1.13,1.12,1.13                |
|                                                |                                                | ratio <sup>c</sup>                | 19:4.4                          | 3.6:2.0                        | 8.7:2.7                       | 4.6:1.8                       |
|                                                | 1.00                                           | $I_{n\omega}^p$ (μA) <sup>a</sup> | 3.76,1.00,0.17                  | 4.64,2.77,1.27                 | 7.50,2.31,0.93                | 6.97,3.30,2.18                |
|                                                |                                                | $E_{n\omega}^p$ (V) <sup>b</sup>  | 0.35,0.35,0.34                  | 0.54,0.53,0.53                 | 1.03,1.03,1.03                | 1.16,1.15,1.16                |
|                                                |                                                | ratio <sup>c</sup>                | 22:5.9                          | 3.7:2.2                        | 8.1:2.5                       | 3.2:1.5                       |
|                                                | 2.00                                           | $I_{n\omega}^p$ (μA) <sup>a</sup> | 4.12,1.11,0.25                  | 4.94,2.95,1.47                 | 9.23,3.06,1.05                | 7.12,3.45,2.20                |
|                                                |                                                | $E_{n\omega}^p$ (V) <sup>b</sup>  | 0.37,0.38,0.38                  | 0.55,0.55,0.55                 | 1.06,1.06,1.06                | 1.19,1.19,1.19                |
|                                                |                                                | ratio <sup>c</sup>                | 17:4.4                          | 3.4:2.0                        | 8.8:2.9                       | 3.2:1.6                       |
|                                                | 3.00                                           | $I_{n\omega}^p$ (μA) <sup>a</sup> | 4.58,1.23,0.24                  | 4.80,2.99,1.42                 | 10.2,3.36,1.06                | 8.00,4.35,2.71                |
|                                                |                                                | $E_{n\omega}^p$ (V) <sup>b</sup>  | 0.39,0.40,0.41                  | 0.57,0.56,0.56                 | 1.09,1.09,1.09                | 1.21,1.22,1.23                |
|                                                |                                                | ratio <sup>c</sup>                | 19:5.1                          | 3.4:2.1                        | 9.6:3.2                       | 3.0:1.6                       |
| RuO <sub>2</sub> .nH <sub>2</sub> O<br>(500°C) | 0.50                                           | $I_{n\omega}^p$ (μA) <sup>a</sup> | 13.2,3.88,1.16                  | 9.27,4.89,2.12                 | 13.3,5.05,2.17                | 39.1,17.8,7.01                |
|                                                |                                                | $E_{n\omega}^p$ (V) <sup>b</sup>  | 0.29,0.29,0.29                  | 0.54,0.54,0.55                 | 0.96,0.96,0.96                | 1.17,1.16,1.16                |
|                                                |                                                | ratio <sup>c</sup>                | 11:3.4                          | 4.4:2.3                        | 6.1:2.3                       | 5.6:2.5                       |
|                                                | 1.00                                           | $I_{n\omega}^p$ (μA) <sup>a</sup> | 15.1,4.43,1.45                  | 7.62,2.86,1.45                 | 26.5,8.15,3.52                | 60.0,23.2,10.2                |
|                                                |                                                | $E_{n\omega}^p$ (V) <sup>b</sup>  | 0.31,0.31,0.32                  | 0.55,0.55,0.55                 | 1.01,1.00,1.01                | 1.21,1.19,1.19                |
|                                                |                                                | ratio <sup>c</sup>                | 10:3.1                          | 5.3:2.0                        | 7.5:2.3                       | 5.9:2.3                       |
|                                                | 2.00                                           | $I_{n\omega}^p$ (μA) <sup>a</sup> | 16.8, 4.32, 1.61                | 7.41;3.46,1.56                 | 29.2,10.5,3.89                | 69.6, 30.5,13.0               |
|                                                |                                                | $E_{n\omega}^p$ (V) <sup>b</sup>  | 0.34,0.35,0.35                  | 0.56,0.56,0.56                 | 1.05,1.05,1.05                | 1.23,1.23,1.24                |
|                                                |                                                | ratio <sup>c</sup>                | 10:2.7                          | 4.8:2.2                        | 7.5:2.7                       | 5.4:2.4                       |
|                                                | 3.00                                           | $I_{n\omega}^p$ (μA) <sup>a</sup> | 15.5,4.54,1.85                  | 7.44,3.50,1.55                 | 30.8,11.6,3.70                | 74.5,27.5,12.5                |
|                                                |                                                | $E_{n\omega}^p$ (V) <sup>b</sup>  | 0.37,0.37,0.36                  | 0.58,0.57,0.57                 | 1.08,1.08,1.08                | 1.26,1.25,1.25                |
|                                                |                                                | ratio <sup>c</sup>                | 8.4:2.5                         | 4.8:2.3                        | 8.3:3.1                       | 6.0:2.2                       |

<sup>a</sup>  $I_{n\omega}^p$  (n = 4,5,6). <sup>b</sup>  $E_{n\omega}^p$  (n = 4,5,6) is the peak potential corresponding to  $I_{n\omega}^p$ . <sup>c</sup> ratio of  $I_{4\omega}^p$  and  $I_{5\omega}^p$  to  $I_{6\omega}^p$ .

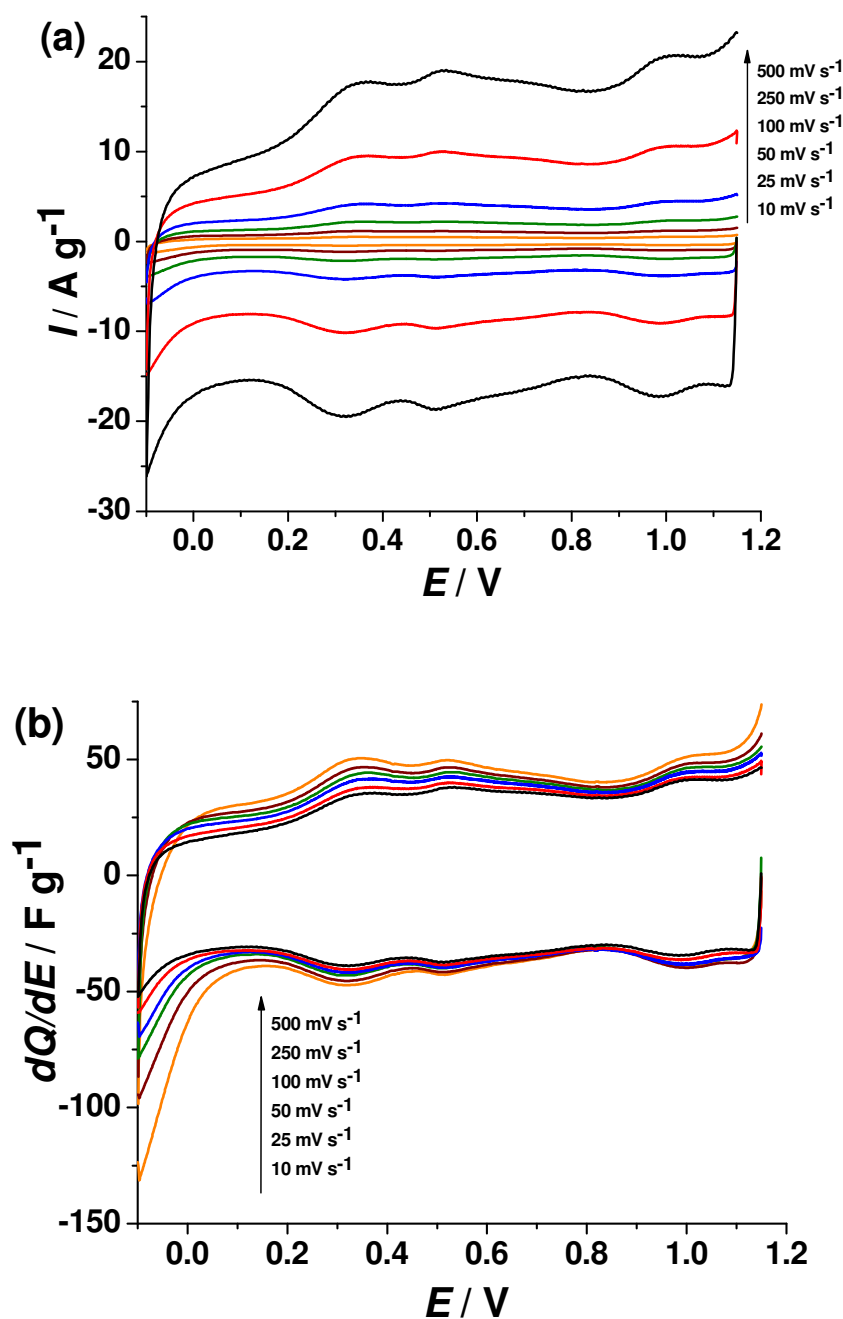

**Figure S1** (a) Dc cyclic voltammograms obtained from an anhydrous RuO<sub>2</sub> thin film modified glassy carbon electrode in contact with 0.5 M H<sub>2</sub>SO<sub>4</sub> aqueous electrolyte solution at designated scan rates. (b) Differential capacitance derived from dc cyclic voltammograms provided in (a).

Figure S1 illustrates the behavior of thin film electrode in the format presented by Sugimoto et. al.,<sup>S1, S2</sup> who derived the electric double layer capacitance ( $C_{dl}$ ), adsorption related charge ( $C_{ad}$ ), and the irreversible redox related charge ( $C_{irr}$ ) from dc voltammograms presented in the differential capacitance per unit mass of electrode material.

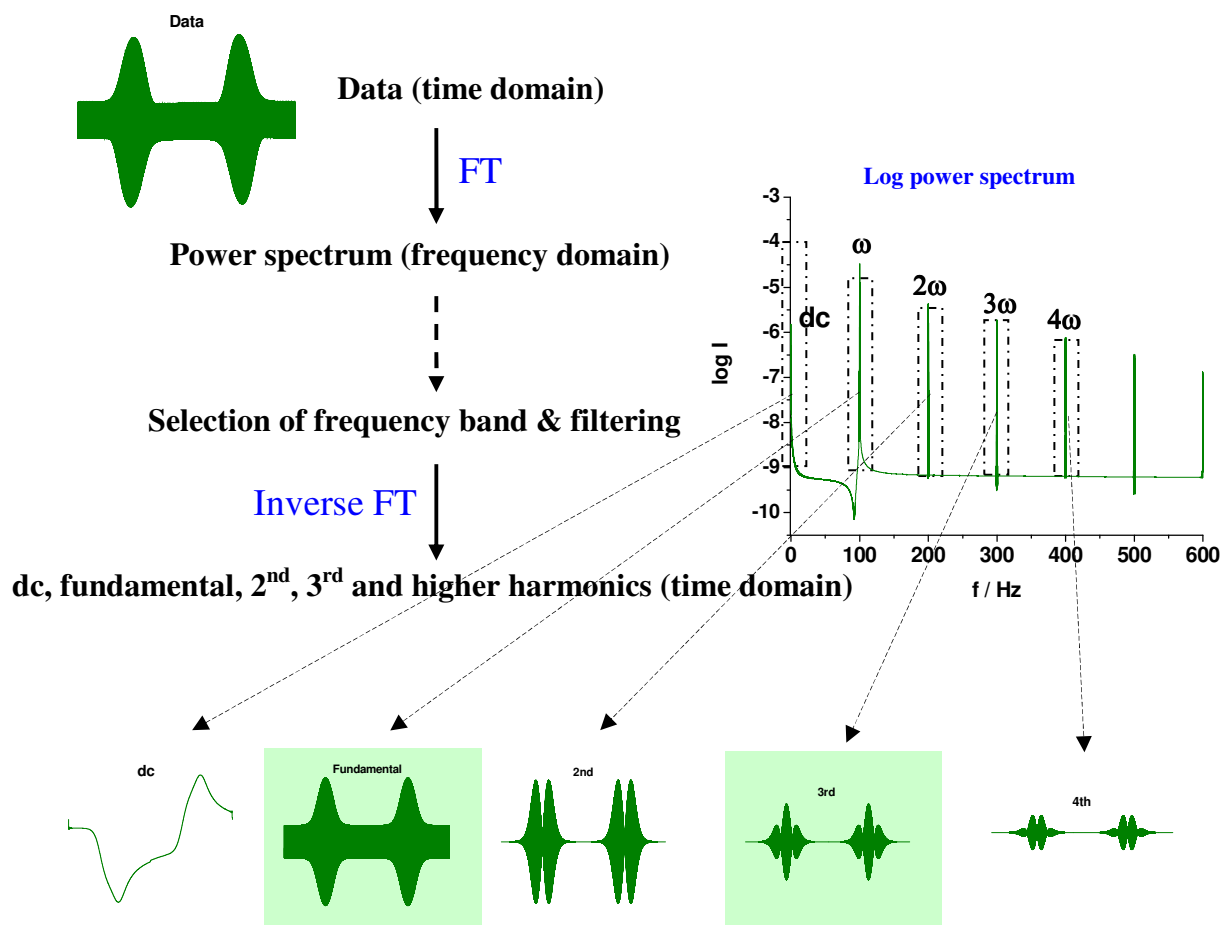

**Figure S2** Schematic illustration of the data processing sequences used in large-amplitude FT ac voltammetry.

Figure S2 provides details of the data processing strategy used in large-amplitude FT ac voltammetry.<sup>S3</sup> Initially, the total (dc and ac) current are collected as a function of the time. The FT algorithm is then used to convert the time domain data to the frequency domain and present the output in the form of a power spectrum. In order to obtain the individual harmonic components, the relevant region (dc or harmonic of interest) in the power spectrum is selected and the power of all other frequencies is set to zero. Application of the inverse Fourier transform then gives the required component. The current component that corresponds to the applied frequency,  $\omega$  is designated as the fundamental harmonic, while the second, third, fourth, fifth etc. harmonic current components are associated with the response at frequencies of  $2\omega$ ,  $3\omega$ ,  $4\omega$ ,  $5\omega$ , respectively. There is also an aperiodic dc component that resembles a conventional cyclic voltammogram, but differs slightly because of the presence of sinusoidal modulation.

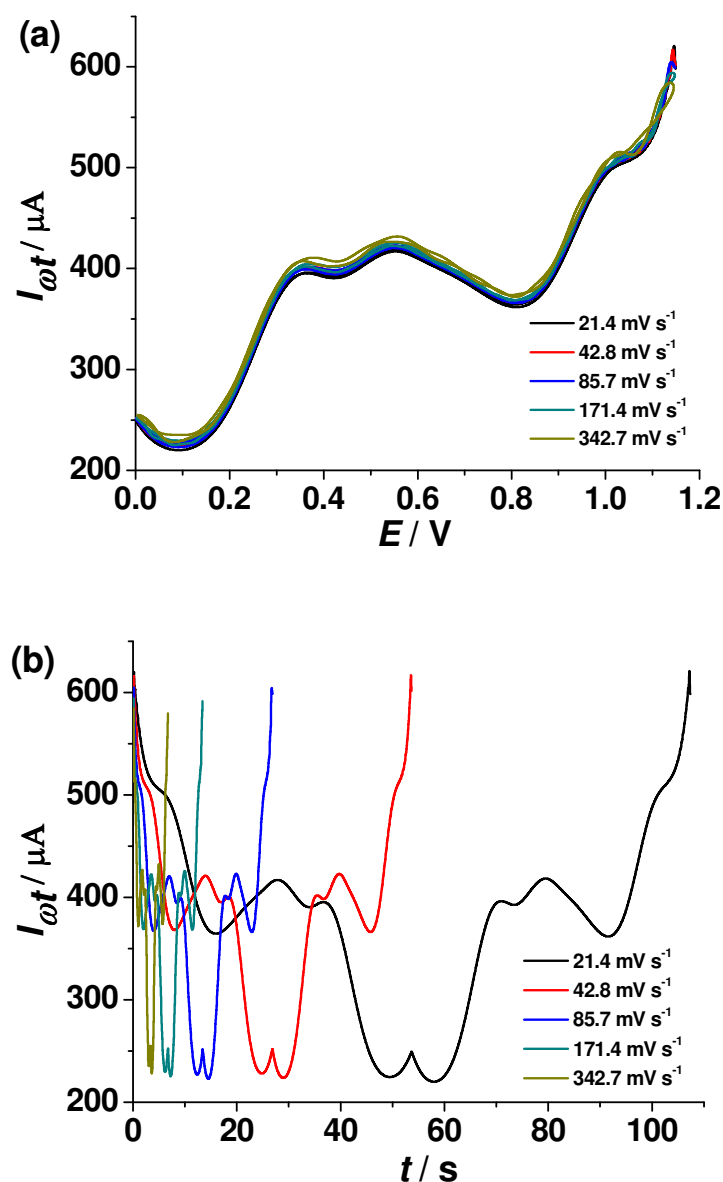

**Figure S3** Dependence of FT-ac fundamental harmonic component on scan rate when an anhydrous  $\text{RuO}_2$  thin film modified glassy carbon electrode is in contact with 0.5 M  $\text{H}_2\text{SO}_4$  aqueous electrolyte. (a) voltage-axis and (b) time-axis format. Experimental conditions:  $E_{\text{start}} = 1.36$  V,  $E_{\text{switch}} = 0.20$  V,  $f = 9.0$  Hz and  $\Delta E = 0.08$  V.

Figure S3a shows the fundamental ac harmonic component is essentially independent of scan rate even though this parameter influences the time scale (Fig. S3b). Equivalently, the second and higher order harmonic components are also independent of scan rate. In comparison, in dc voltammetry (Fig. S1a), the scan rate contributes significantly to the value of the peak current magnitude.

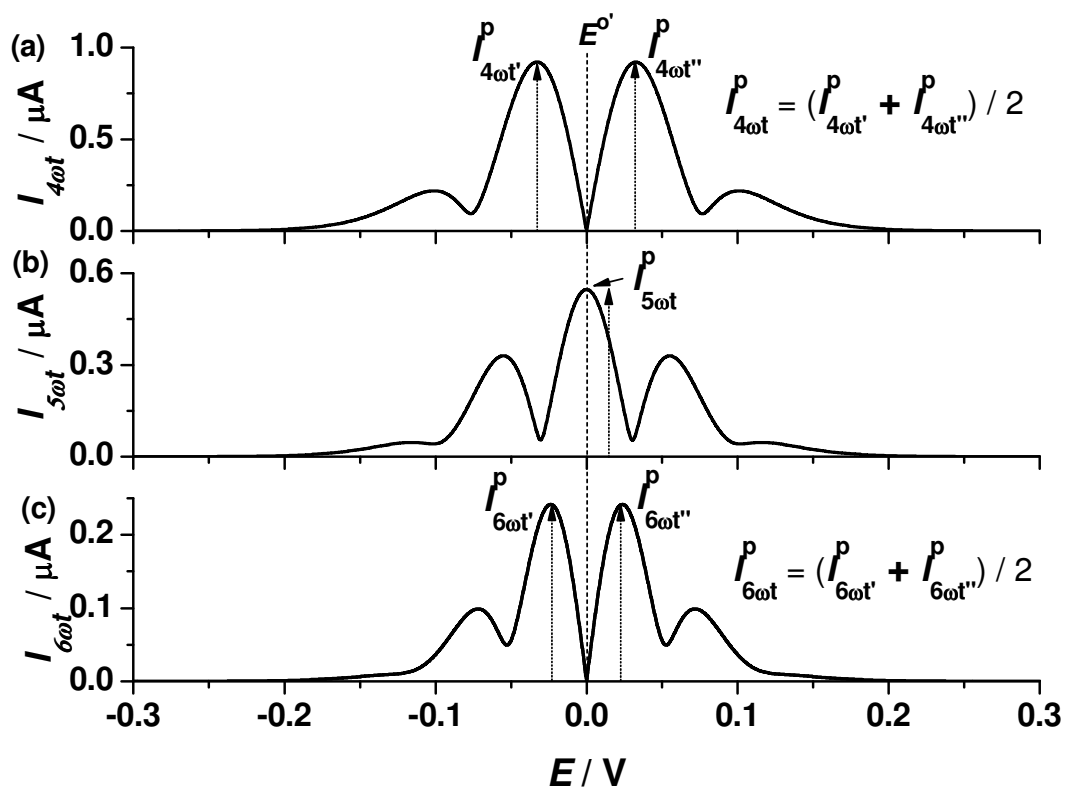

**Figure S4** Illustration of the methods used to determine analogues of dc voltammetric mid-point potentials ( $E_m$ ) and ac harmonic peak current magnitudes for (a) fourth, (b) fifth and sixth ac harmonics.

Figure S4 illustrates the procedures used to analyze the higher harmonic ac data. The first step is to estimate the  $E_m$  of the redox centre. This can be estimated as shown from the average of the dc peak potentials (see Fig. 1). For the odd (fifth) harmonic peak current value,  $I_{5\omega t}^p$  is derived from the central lobe that exhibits the maximum peak current magnitude. In the case of the even (fourth and sixth) harmonics, the peak currents,  $I_{4\omega t}^p$  and  $I_{6\omega t}^p$  represent the average values of the two lobes having the maximum current. Note that this example is based on simulation of a simple process that exhibits fast electron transfer. In the case of slow electron transfer or rate determining coupled protonation steps, symmetry may be lost. In this case, reference to the  $E_m$  is used via the strategy shown in Fig. 1.

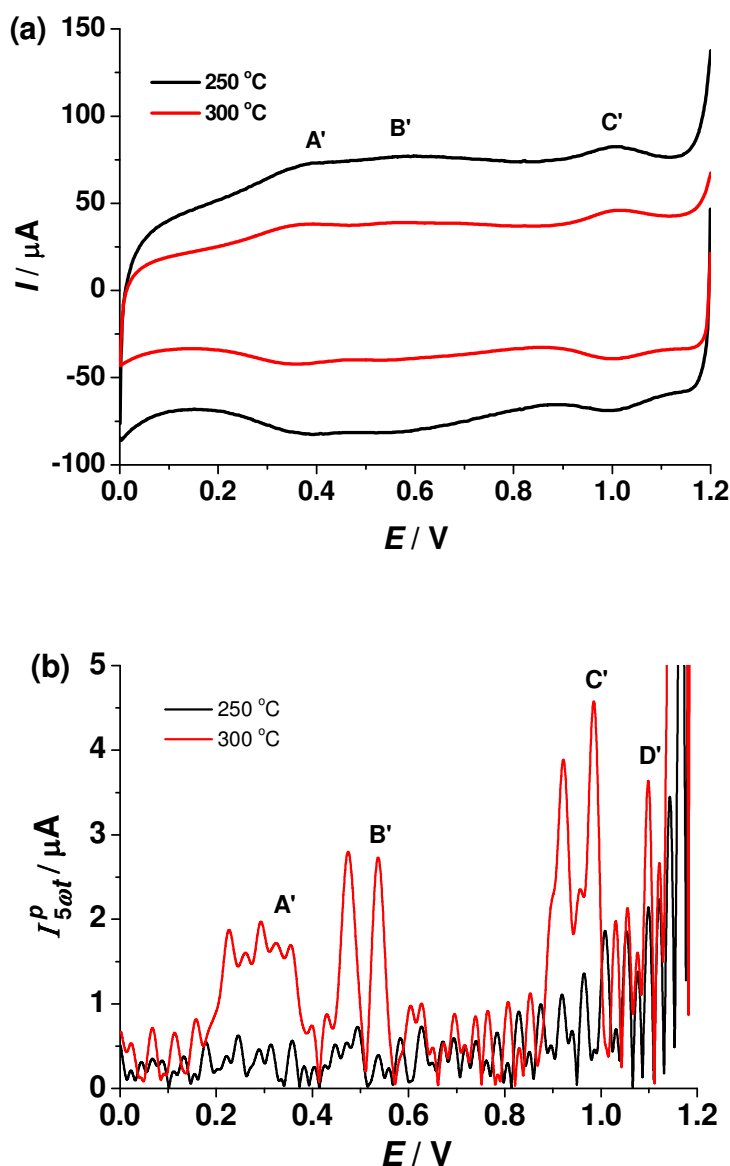

**Figure S5** (a) Dc ( $\nu = 0.045 \text{ V s}^{-1}$ ) and (b) fifth harmonic FT-ac cyclic voltammograms obtained when a RuO<sub>2</sub>.nH<sub>2</sub>O (heat-treated at 250 °C or 300 °C) thin film modified glassy carbon electrode is in contact with 0.5 M H<sub>2</sub>SO<sub>4</sub> aqueous electrolyte. For the FT-ac experiments:  $E_{\text{start}} = 1.20 \text{ V}$ ,  $E_{\text{switch}} = 0.00 \text{ V}$ ,  $f = 9.0 \text{ Hz}$ ,  $\Delta E = 0.08 \text{ V}$  and  $\nu = 0.045 \text{ V s}^{-1}$ .

The decrease in water content of the hydrated RuO<sub>2</sub>.nH<sub>2</sub>O that occurs upon heat-treatment gives rise to a decrease in the double layer capacitance (Fig. S6a). The background current detected after heat-treatment at 300 °C is nearly half that found with heat-treatment at 250 °C. In the ac fifth harmonic component (Fig. S6b), the faradaic processes associated with the hydrated RuO<sub>2</sub>.nH<sub>2</sub>O sample heat-treated at 250 °C are weak. In contrast, all four ruthenium based processes at ac fifth harmonic become well defined after heat-treatment at  $\geq 300 \text{ °C}$ .

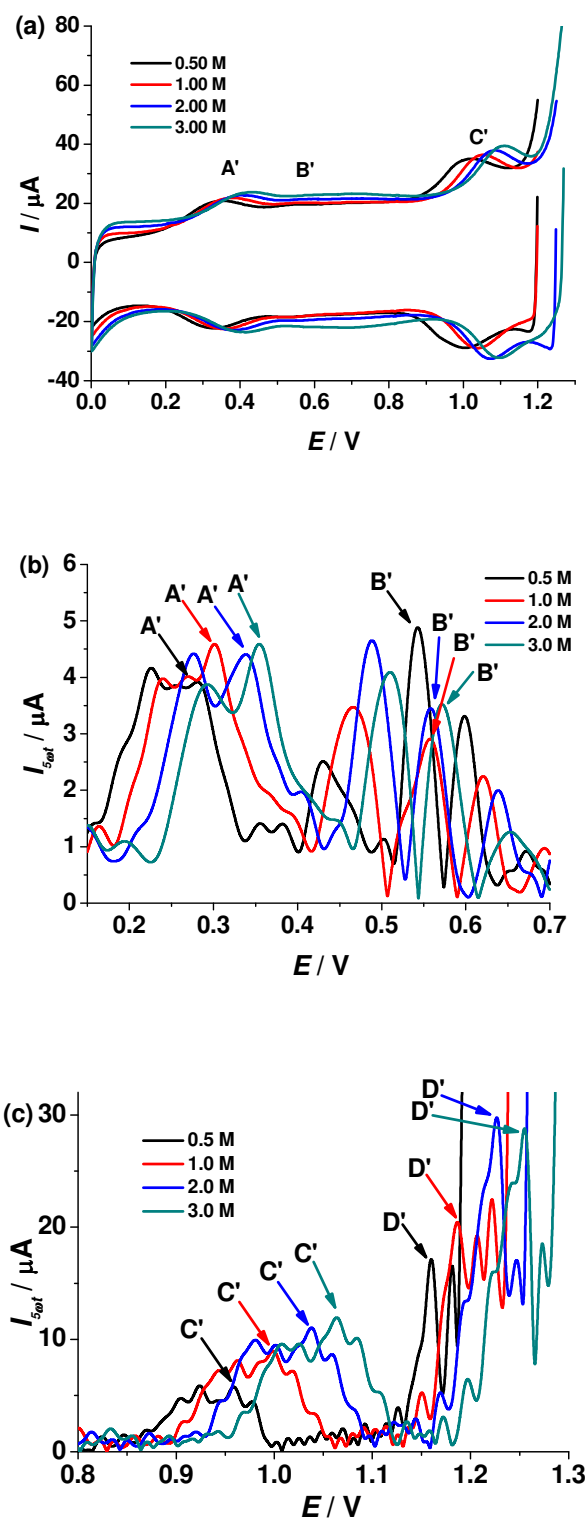

**Figure S6** (a) Dc ( $\nu = 0.045 \text{ V s}^{-1}$ ) and (b)-(c) Fifth harmonic FT ac cyclic voltammograms obtained from an hydrated RuO<sub>2</sub>.nH<sub>2</sub>O (500 °C) thin film modified glassy carbon electrode in contact with designated H<sub>2</sub>SO<sub>4</sub> concentrations (0.5 M to 3.0 M). For the FT ac voltammetric experiments:  $f = 9.0 \text{ Hz}$ ,  $\Delta E = 0.08 \text{ V}$ ,  $E_{\text{switch}} = 0.00 \text{ V}$  and in 0.5 M H<sub>2</sub>SO<sub>4</sub> ( $E_{\text{start}} = 1.20 \text{ V}$ ,  $\nu = 0.045 \text{ Vs}^{-1}$ ); 1.0 M H<sub>2</sub>SO<sub>4</sub> ( $E_{\text{start}} = 1.25 \text{ V}$ ,  $\nu = 0.047 \text{ Vs}^{-1}$ ); 2.0 M H<sub>2</sub>SO<sub>4</sub> ( $E_{\text{start}} = 1.27 \text{ V}$ ,  $\nu = 0.047 \text{ Vs}^{-1}$ ) and 3.0 M H<sub>2</sub>SO<sub>4</sub> ( $E_{\text{start}} = 1.30 \text{ V}$ ,  $\nu = 0.048 \text{ Vs}^{-1}$ ). Processes A', B', C' and D' are assigned to Ru(III)/(II), Ru(IV)/(III), Ru(IV)/(V) and Ru(V)/(VI), respectively.



## References

- [S1] Sugimoto, W., Kizaki, T., Yokoshima, K., Murakami, Y., Takasu, Y. Evaluation of the pseudocapacitance in RuO<sub>2</sub> with a RuO<sub>2</sub>/GC thin film electrode *Electrochim. Acta.* **49**, 313-320 (2004).
- [S2] Sugimoto, W.; Yokoshima, K.; Murakami, Y.; Takasu, Y. Charge storage mechanism of nanostructured anhydrous and hydrous ruthenium-based oxides. *Electrochim. Acta.* **52**, 1742-1748 (2006).
- [S3] Bond, A. M., Duffy, N. W., Guo, S.-X., Zhang J. & Elton, D. M. Changing the look of voltammetry: can FT revolutionize voltammetric techniques as it did for NMR? *Anal. Chem.* **77**, 186A-195A (2005).
